# Supplementary material for: Transcriptomics of Tasmanian Devil (Sarcophilus Harrisii) Ear Tissue Reveals Homogeneous Gene Expression Patterns across a Heterogeneous Landscape
Source: PubMed Central journal article supplement (PMC6826840; doi:10.3390/genes10100801), 2019-10-12
Supplement: genes-10-00801-s001.pdf [file genes-10-00801-s001.pdf]

## Supplementary materials for:

Tasmanian devil (*Sarcophilus harrisi*) populations lack differential gene expression between sex and geographic location in ear tissue

Alexandra K. Fraik<sup>1</sup>, Corey Quackenbush<sup>1</sup>, Mark J. Margres<sup>1,2</sup>, Sebastien Comte<sup>3,4</sup>, David G. Hamilton<sup>3</sup>, Christopher Kozakiewicz<sup>1</sup>, Menna Jones<sup>3</sup>, Rodrigo Hamede<sup>3</sup>, Paul A. Hohenlohe<sup>5</sup>, Andrew Storfer<sup>1,\*</sup>, Joanna L. Kelley<sup>1</sup>

### ***Affiliations:***

<sup>1</sup>*School of Biological Sciences, Washington State University Pullman, WA 99164, USA*

<sup>2</sup>*Department of Biological Sciences, Clemson University, Clemson, SC 29634*

<sup>3</sup>*School of Natural Sciences, Hobart, TAS 7001, Australia*

<sup>4</sup>*Vertebrate Pest Research Unit, NSW Department of Primary Industries, 1447 Forest Road, Orange, New South Wales 2800, Australia*

<sup>5</sup>*Department of Biological Sciences, University of Idaho, Institute for Bioinformatics and Evolutionary Studies, University of Idaho, 875 Perimeter Drive, Moscow, Idaho 83844,*

|                               | Mean Annual Temperature (°C) | Precipitation Seasonality (mm) | Isothermality | Annual Temperature Range (°C) | Enhanced Vegetation Index (EVI) | Length of Sealed Roads (km) | Elevation (m) | Surface Area of Water (m <sup>2</sup> ) |
|-------------------------------|------------------------------|--------------------------------|---------------|-------------------------------|---------------------------------|-----------------------------|---------------|-----------------------------------------|
| <b>Arthur River (ARV)</b>     | 12.59                        | 34.01                          | 49.73         | 12.30                         | 52.46                           | 9.96                        | 48.00         | 280917.49                               |
| <b>Freycinet (FRY)</b>        | 12.67                        | 14.51                          | 54.09         | 17.24                         | 74.01                           | 61.65                       | 57.17         | 4814676.77                              |
| <b>West Pencil Pine (WPP)</b> | 7.98                         | 31.17                          | 47.98         | 17.11                         | 61.24                           | 245.23                      | 703.74        | 77396.95                                |

**Supplementary Table 1: Abiotic environmental centroid values among populations.** The centroid values for the eight abiotic

environmental variables and the biotic variable utilized in the GEA associations for each population sampled. We plotted the location of every sampled Tasmanian devil and calculated the centroid for each sampling area. We then constructed a circular buffer with a 5 km radius around each centroid to represent the sampled area for each study site, which we then used to extract the environmental data. These environmental data were obtained from [www.ga.gov.au](http://www.ga.gov.au), [www.worldclim.org](http://www.worldclim.org), and [www.thelist.tas.gov.au](http://www.thelist.tas.gov.au) (see Supplementary Table 1 for a list of the eight abiotic environmental variables we included as qualitative descriptors of the sampling locations). We used ArcGIS version 10 (ESRI 2011) for all spatial analyses.

| <b>Sample ID</b>           | <b>Population Sex</b> |        | <b>Number Reads Pre-Trimming</b> | <b>Number Reads Post-Trimming</b> | <b>HiSat2 Mapping Percent</b> | <b>Percent Coding Bases</b> | <b>Percent UTR Bases</b> | <b>Percent Intronic Bases</b> | <b>Percent Intergenic Bases</b> | <b>Percent mRNA Bases</b> |
|----------------------------|-----------------------|--------|----------------------------------|-----------------------------------|-------------------------------|-----------------------------|--------------------------|-------------------------------|---------------------------------|---------------------------|
| <b>1</b>                   | ARV                   | Female | 21,087,038                       | 19,833,002                        | 83.7                          | 51.0                        | 8.7                      | 5.9                           | 34.4                            | 59.7                      |
| <b>2</b>                   | ARV                   | Male   | 21,508,474                       | 20,618,302                        | 85.6                          | 49.4                        | 9.1                      | 4.9                           | 36.6                            | 58.5                      |
| <b>3</b>                   | ARV                   | Male   | 24,409,004                       | 23,803,520                        | 90.0                          | 42.8                        | 9.3                      | 9                             | 38.9                            | 52.1                      |
| <b>4</b>                   | ARV                   | Female | 30,892,554                       | 30,086,866                        | 89.2                          | 46.9                        | 9.6                      | 5.9                           | 37.6                            | 56.5                      |
| <b>5</b>                   | ARV                   | Male   | 21,059,740                       | 19,895,594                        | 83.7                          | 47.8                        | 9.2                      | 5.5                           | 37.4                            | 57.1                      |
| <b>6</b>                   | ARV                   | Female | 30,273,938                       | 29,467,814                        | 89.1                          | 46.4                        | 9.6                      | 5.9                           | 38.1                            | 56.0                      |
| <b>7</b>                   | FRY                   | Female | 20,457,152                       | 20,053,534                        | 82.7                          | 47.3                        | 9.5                      | 6.0                           | 37.2                            | 56.8                      |
| <b>8</b>                   | FRY                   | Male   | 20,389,108                       | 19,612,834                        | 81.7                          | 47.0                        | 10.0                     | 5.5                           | 37.6                            | 57.0                      |
| <b>9</b>                   | FRY                   | Female | 28,636,486                       | 27,858,674                        | 87.9                          | 49.0                        | 9.7                      | 5.1                           | 36.2                            | 58.7                      |
| <b>10</b>                  | FRY                   | Female | 19,282,898                       | 18,748,094                        | 88.4                          | 47.1                        | 8.8                      | 8.7                           | 35.5                            | 55.9                      |
| <b>11</b>                  | FRY                   | Male   | 22,524,552                       | 22,000,826                        | 81.6                          | 47.0                        | 9.1                      | 6.7                           | 37.1                            | 56.2                      |
| <b>12</b>                  | FRY                   | Male   | 13,126,976                       | 12,821,570                        | 78.9                          | 47.1                        | 10.0                     | 5.5                           | 37.4                            | 57.2                      |
| <b>13</b>                  | WPP                   | Female | 20,175,034                       | 19,354,872                        | 82.2                          | 50.3                        | 9.0                      | 5.8                           | 34.8                            | 59.4                      |
| <b>14</b>                  | WPP                   | Male   | 20,659,934                       | 20,012,910                        | 82.4                          | 48.5                        | 9.3                      | 5.7                           | 36.5                            | 57.8                      |
| <b>15</b>                  | WPP                   | Female | 28,023,276                       | 27,318,236                        | 87.5                          | 47.9                        | 9.7                      | 5.9                           | 36.4                            | 57.7                      |
| <b>16</b>                  | WPP                   | Male   | 30,090,240                       | 29,205,678                        | 88.9                          | 46.9                        | 9.5                      | 6.3                           | 37.4                            | 56.3                      |
| <b>17</b>                  | WPP                   | Female | 33,284,436                       | 32,391,218                        | 91.8                          | 43.8                        | 8.9                      | 8.7                           | 38.6                            | 52.7                      |
| <b>18</b>                  | WPP                   | Female | 20,433,336                       | 19,910,918                        | 87.1                          | 47.8                        | 9.8                      | 6.3                           | 36.2                            | 57.6                      |
| <b>19</b>                  | WPP                   | Male   | 18,643,388                       | 18,092,414                        | 79.8                          | 41.9                        | 10.4                     | 6.4                           | 41.3                            | 52.3                      |
| <b>20</b>                  | WPP                   | Male   | 24,100,656                       | 23,427,902                        | 85.0                          | 47.7                        | 9.2                      | 5.9                           | 37.2                            | 56.9                      |
| <b>Ear Sample Averages</b> |                       |        | 23,461,028                       | 22,733,820                        | 85.0                          | 46.8                        | 9.5                      | 6.2                           | 37.4                            | 56.3                      |
| <b>Milk Transcriptome</b>  | Zoo                   | Female | 2,435,1459,062                   | 22,838,662,422                    | 93.8                          | 66.9                        | 5.8                      | 4.5                           | 22.8                            | 72.7                      |

6 **Supplementary Table 2: Alignment rates from devil ear tissue and the published devil milk transcriptome.** HISAT2 alignment  
7 rates and mapping statistics for the transcriptomes produced from the ear tissue as well as the published milk transcriptome  
8 downloaded from NCBI (accession #PRJNA510591). The three sampled populations included Arthur River (ARV), West Pencil Pine  
9 (WPP) and Freycinet (FRY).

| <b>GO Term</b>                                        | <b>Genes</b> | <b>FDR</b> |
|-------------------------------------------------------|--------------|------------|
| <b><i>Biological Processes</i></b>                    |              |            |
| Macromolecule metabolic process (GO:0043170)          | 6            | 0.003      |
| Cellular macromolecule metabolic process (GO:0044260) | 5            | 0.034      |
| Oxidation-reduction process (GO:0055114)              | 13           | 0.038      |
| Lipid metabolic process (GO:0006629)                  | 13           | 0.046      |
| <b><i>Molecular Function</i></b>                      |              |            |
| Binding (GO:0005488)                                  | 36           | 0.000      |
| Protein binding (GO:0005515)                          | 24           | 0.000      |
| <b><i>Cellular Component</i></b>                      |              |            |
| Cell part (GO:0044464)                                | 48           | 0.004      |
| Intracellular (GO:0005622)                            | 40           | 0.007      |
| Membrane-bounded organelle (GO:0043227)               | 31           | 0.008      |
| Organelle part (GO:0044422)                           | 19           | 0.002      |
| Nucleus (GO:0005634)                                  | 13           | 0.023      |
| Cytosol (GO:0005829)                                  | 8            | 0.018      |
| Organelle lumen (GO:0043233)                          | 8            | 0.018      |
| Intracellular organelle lumen (GO:0070013)            | 8            | 0.016      |
| Membrane-enclosed lumen (GO:0031974)                  | 8            | 0.015      |

10

11 **Supplementary Table 3: Gene-ontology enrichment analysis of co-expressed genes associated**  
12 **with FRY and ARV.** Gene-ontology enrichment analysis results for co-expressed genes in  
13 Module28 which was strongly associated with the FRY and ARV populations.

| <b>GO Term</b>                                  | <b>Genes</b> | <b>FDR</b> |
|-------------------------------------------------|--------------|------------|
| <b><i>Molecular Function</i></b>                |              |            |
| Structural constituent of ribosome (GO:0003735) | 7            | 0.001      |
| Structural molecule activity (GO:0005198)       | 7            | 0.043      |
| <b><i>Cellular Component</i></b>                |              |            |
| Regulator complex (GO:0071986)                  | 2            | 0.057      |
| RNA polymerase I complex (GO:0005736)           | 2            | 0.049      |
| Ribosome (GO:0005840)                           | 7            | 0.000      |
| Ribosomal subunit (GO:0044391)                  | 4            | 0.047      |
| Mitochondrial protein complex (GO:0098798)      | 5            | 0.034      |
| Mitochondrial part (GO:0044429)                 | 7            | 0.045      |
| Ribonucleoprotein complex (GO:1990904)          | 8            | 0.034      |
| Mitochondrion (GO:0005739)                      | 13           | 0.001      |
| Cytoplasmic part (GO:0044444)                   | 28           | 0.003      |

14

15 **Supplementary Table 4: Gene-ontology enrichment analysis of co-expressed genes**

16 **associated with sex.** Gene-ontology enrichment analysis results for co-expressed genes in

17 Module3 which was strongly associated with sex.

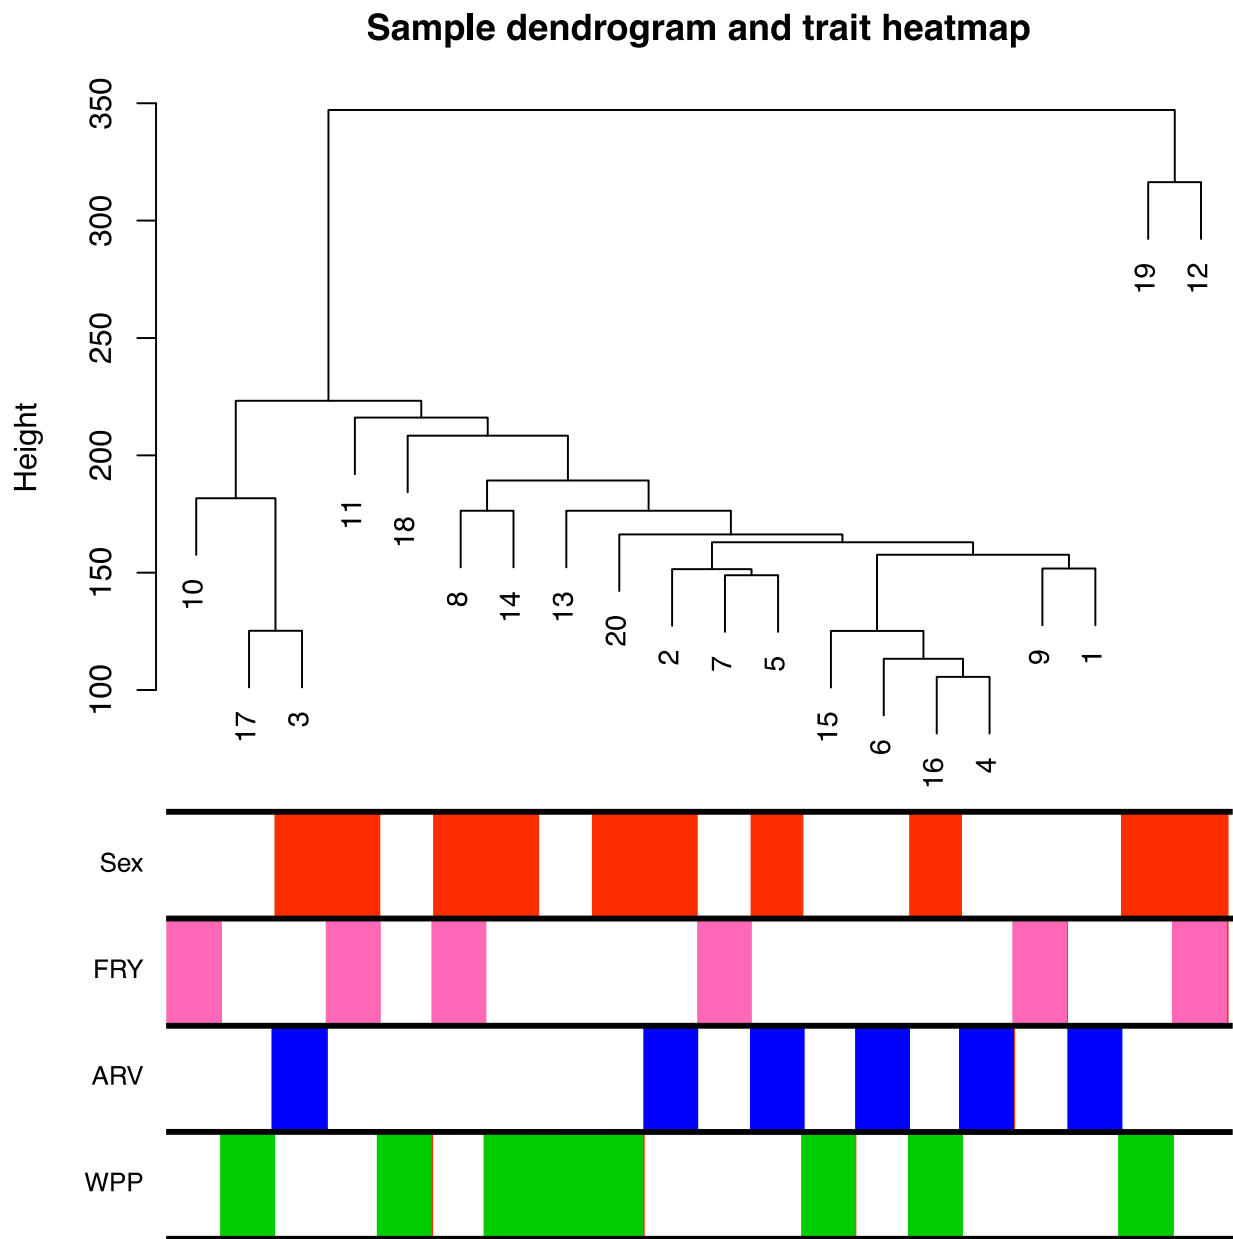

**Supplementary Figure 1: Sample dendrogram and trait heatmap.** Dendrograms of samples showing clustering patterns based on population and sex. Colored blocks indicate assignment of a specific sample (numbered 1-20) to the variables of interest: geographic location or sex.

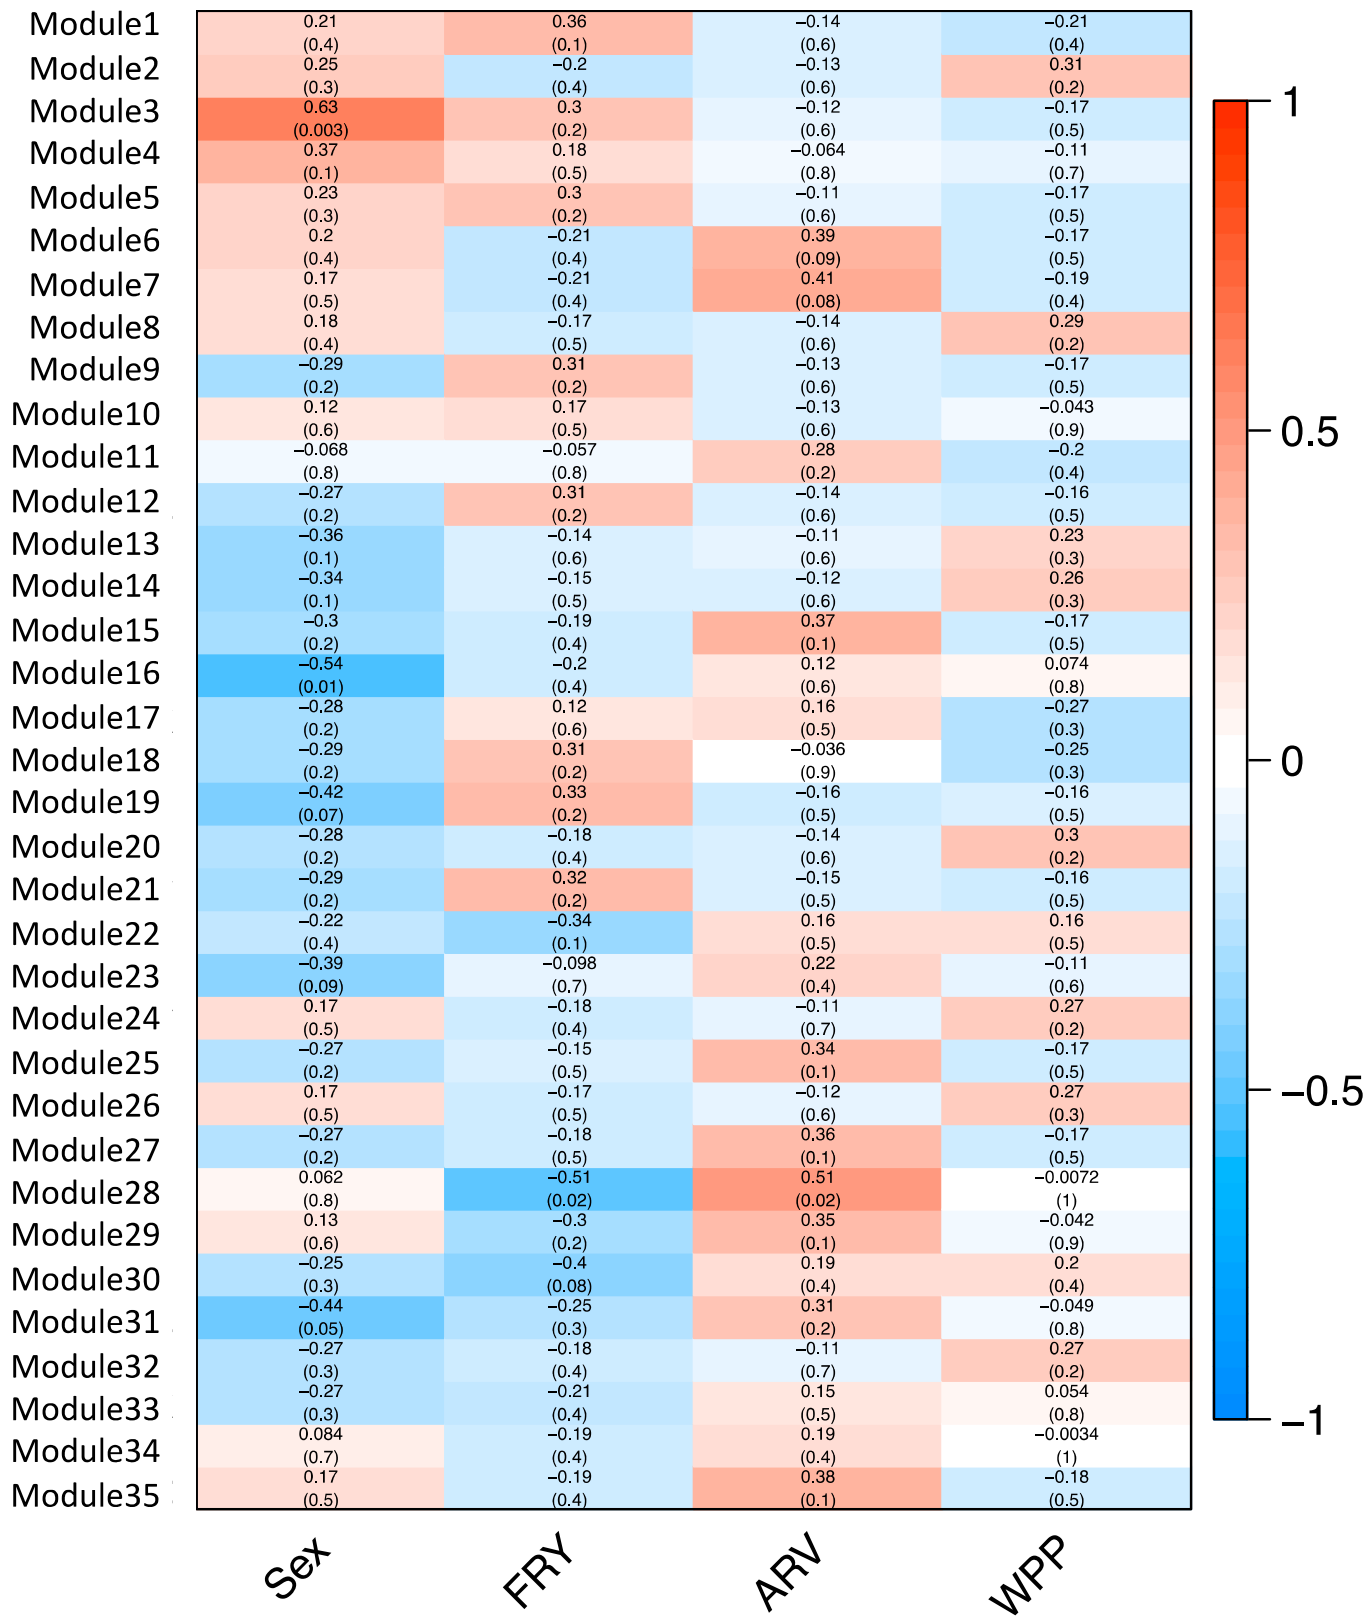



**Supplementary Figure 2: Weighted gene co-expression module heat map.** Weighted gene co-expression module heat map with gene modules of co-expressed genes occupying the rows and the covariates of interest representing the column values. The first column represents the comparison between modules of gene co-expression and sex. Each subsequent column value represents a population pairwise comparison (i.e., ARV is the comparison of the Arthur River population to the combination of the Freycinet and West Pencil Pine populations). The values in the block above the value in the parentheses are Pearson's correlate describing the strength of the relationship between each gene module and each covariate of interest. Values in the parentheses are the p-values indicating the significance of the relationship between gene module and covariate of interest. Cold colors indicate a negative relationship between the Pearson's correlate between the module and covariate while warm colors indicate a positive relationship.

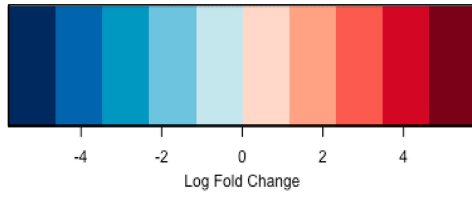

Core Enrichment = \*

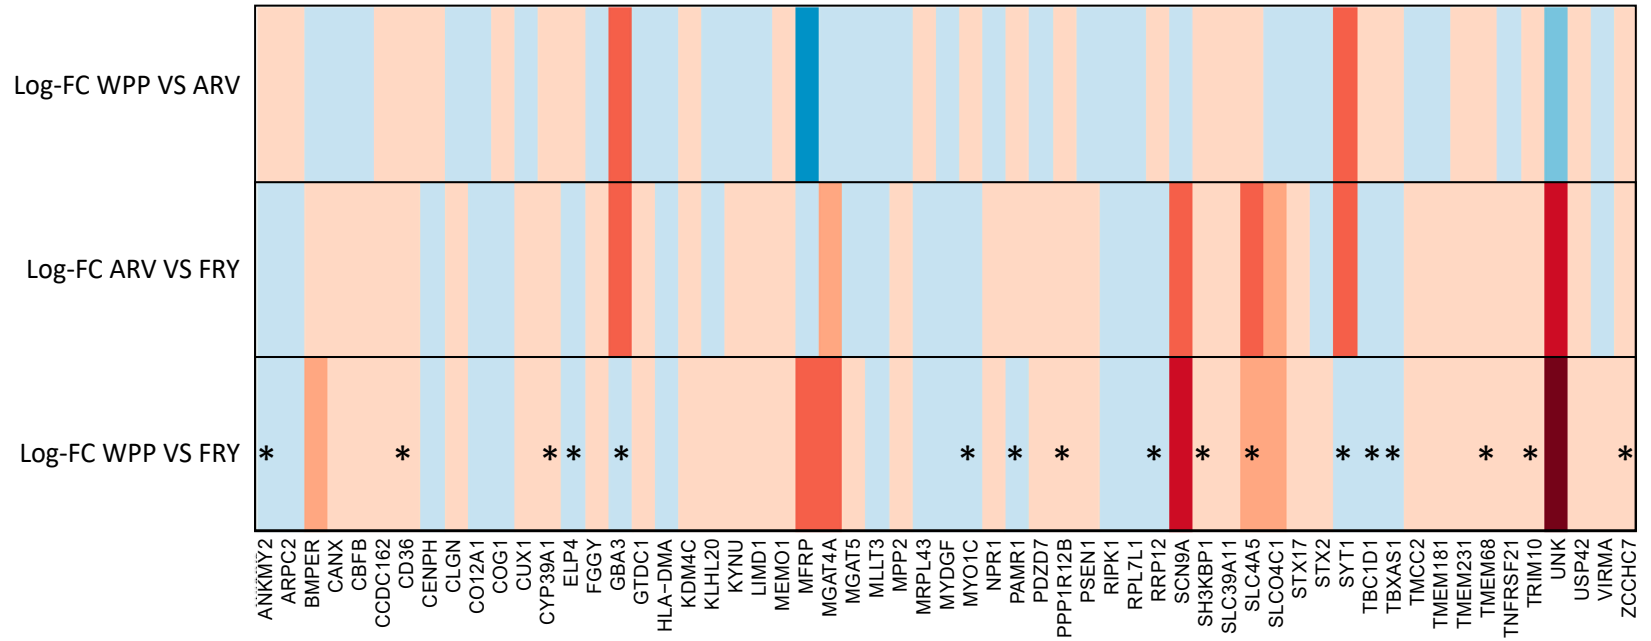

2 **Supplementary Figure 3: Differential gene expression of landscape genomic candidate genes.** Heatmap showing the Log<sub>2</sub>FC  
3 (Log-transformed fold change) for each of the candidate genes for local adaptation to abiotic environment in a Tasmanian devils  
4 landscape genomics (LG) study identified by Fraik et al. 2019. Asterisks indicate these genes were significantly enriched in the  
5 leading edge of significant gene set enrichment analyses. Only pairwise population comparisons in gene expression between FRY &  
6 ARV and WPP & FRY were significant.

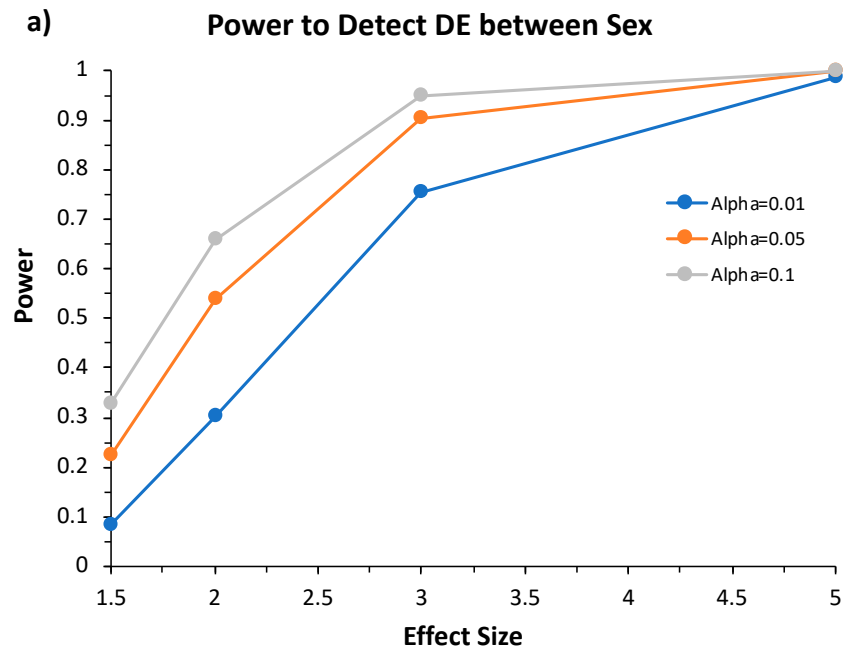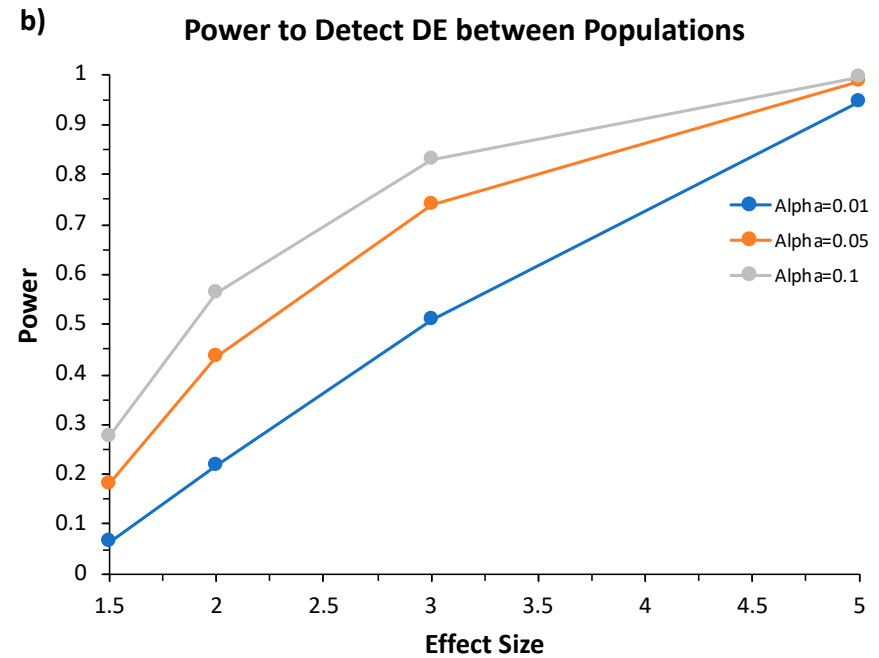

7 **Supplementary Figure 4: Power analysis between sex and populations.** Power analysis was conducted to quantify whether we had  
 8 sufficient power to identify significant variation in expression of genes between our biological conditions. Our experimental design  
 9 had significant power (> 70%) to detect differential gene expression at an  $\alpha=0.05$  between the sexes (a) and geographic sampling  
 10 locations (b) at higher effect sizes ( $\text{Log}_2\text{FC} > 3$ ).
